# Supplementary material
Source: HighWire-hosted journal article supplement (https://svn.smart01.highwire.org/content/6/2/170)
Supplement: inline-supplementary-material-2 [file inline-supplementary-material-2.pdf]

**Risk of bias in individual studies**

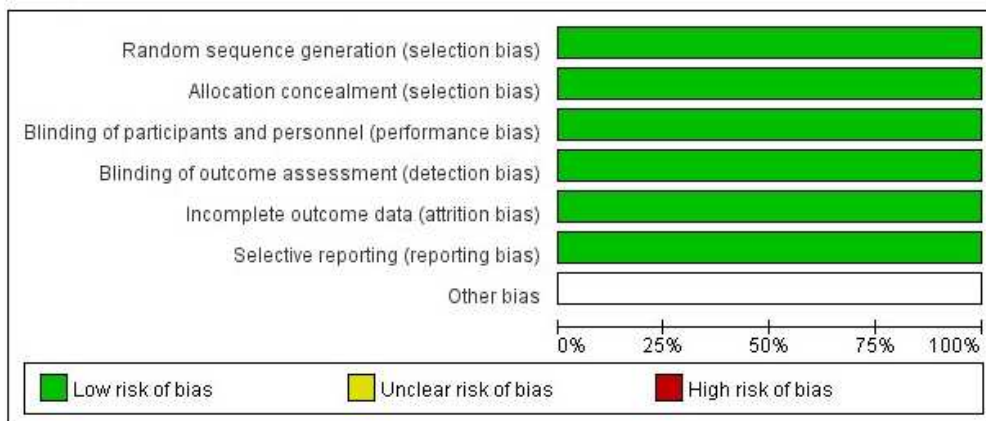

**A** Risk of bias graph: review authors' judgements about each risk of bias item presented as percentages across all included studies.

|                        | Random sequence generation (selection bias) | Allocation concealment (selection bias) | Blinding of participants and personnel (performance bias) | Blinding of outcome assessment (detection bias) | Incomplete outcome data (attrition bias) | Selective reporting (reporting bias) | Other bias |
|------------------------|---------------------------------------------|-----------------------------------------|-----------------------------------------------------------|-------------------------------------------------|------------------------------------------|--------------------------------------|------------|
| SPOTLIGHT STOP-IT 2019 | +                                           | +                                       | +                                                         | +                                               | +                                        | +                                    |            |
| STOP-AUST 2020         | +                                           | +                                       | +                                                         | +                                               | +                                        | +                                    |            |
| TICH-2 2018            | +                                           | +                                       | +                                                         | +                                               | +                                        | +                                    |            |
| TRAIGE 2021            | +                                           | +                                       | +                                                         | +                                               | +                                        | +                                    |            |

**B** Risk of bias summary: review authors' judgements about each risk of bias item for each included study.
