# Supplementary material
Source: HighWire-hosted journal article supplement (https://svn.smart01.highwire.org/content/6/2/170)
Supplement: inline-supplementary-material-5 [file inline-supplementary-material-5.pdf]

**Risk of publication bias**

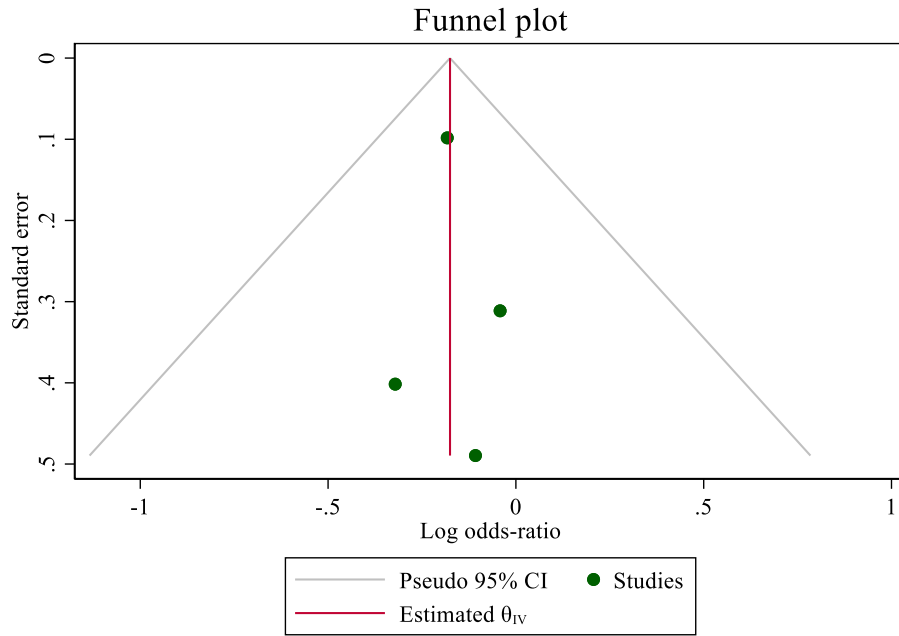

**A Funnel plot for the outcome of HE**

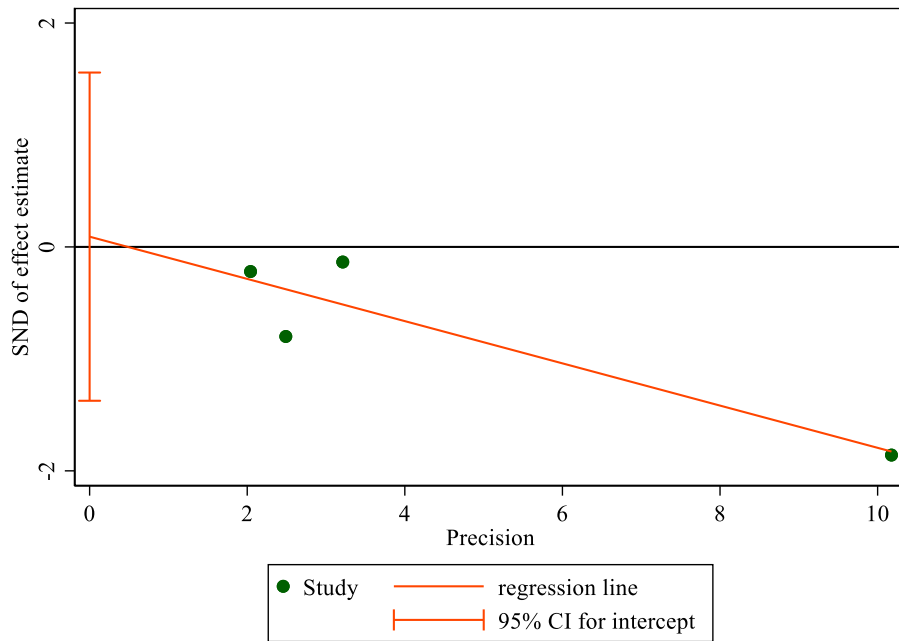

**B Egger's test for small-study effects**
